# Supplementary material for: Deposition of potentially toxic metals in the soil from surrounding cement plants in a karst area of Southeastern Brazil
Source: Research Square preprint supplement (doi:10.21203/rs.3.rs-498778/v1), 2021-05-14
Supplement: Supplementary file 1 [file 617b80cfc9bf7e713343c9d2.docx]

# Title: Deposition of potentially toxic metals in the soil from surrounding cement plants in a karst area of Southeastern Brazil

Bambuí, May 05, 2021.

Dear Editor,

Please find enclosed the manuscript: “**Deposition of potentially toxic metals in the soil from surrounding cement plants in a karst area of Southeastern Brazil**” by Thiago Augusto da Costa e Silva, Marcos de Paula Jr., Washington Santos Silva and Gustavo Augusto Lacorteto be submitted to Archives of Environmental Contamination and Toxicology Journal for consideration to publication. Authors agree to its submission and this manuscript has not been published peer-reviewed before and is not concurrently being considered for publication elsewhere.

We consider that our findings contributes to a better comprehension about the impacts of cement plant operations to environment and human populations and that our results constitute strong evidences of the need to incorporate the contamination and enrichment indices (Igeo and EF) as well as Health Risk Assessments (NCR and CR indices) not only in instruments of risk assessment to the environmental contamination by local environmental agencies, but also as a tool for monitoring programs of PTM pollution to be incorporated in Environmental Management Systems of cement industries. Therefore, we choose to submit our manuscript to Archives of Environmental Contamination and Toxicology Journal because we consider that our work fits well at journal scope.

Sincerely,

Gustavo Augusto Lacorte
